# Supplementary material
Source: PubMed Central journal article supplement (PMC4503651)
Supplement: 15_023_Chen_Suppl.pdf [file 15_023_Chen_Suppl.pdf]

## Supplemental Data

# Pentoxifylline Attenuates Proteinuria in Anti-Thy1 Glomerulonephritis via Downregulation of Nuclear Factor- $\kappa$ B and Smad2/3 Signaling

Yung-Ming Chen,<sup>1,2</sup> Wen-Chih Chiang,<sup>1</sup> Yalin Yang,<sup>1</sup> Chun-Fu Lai,<sup>1</sup> Kwan-Dun Wu,<sup>1</sup> and Shuei-Liong Lin<sup>1</sup>

Online address: <http://www.molmed.org>

The Feinstein Institute  
for Medical Research   
Empowering Imagination. Pioneering Discovery.®

**Supplementary Table S1.** Primer pairs used for quantitative PCR.

| Genes                  |              | Sequences                         |
|------------------------|--------------|-----------------------------------|
| Rat TNF- $\alpha$      | <i>upper</i> | 5' CGATTGGCCACTTCATAC             |
|                        | <i>lower</i> | 5' GACTCCGTGATGTCTAAG             |
| Rat IL-1 $\beta$       | <i>upper</i> | 5' AATCTCACAGCAGCATCTC            |
|                        | <i>lower</i> | 5' AGCAGGTCGTCATCATCC             |
| Rat MCP-1              | <i>upper</i> | 5' GCATCCACTCTCTTTCCAC            |
|                        | <i>lower</i> | 5' AGGCATCACATTCCAAATCAC          |
| Rat TGF- $\beta$ 1     | <i>upper</i> | 5' TATATGTTCTTCAATACG             |
|                        | <i>lower</i> | 5' TATATTTCTGGTAGAGTT             |
| Rat TGF- $\beta$ 2     | <i>upper</i> | 5' TCATACCGTCTAATAATTACATCA       |
|                        | <i>lower</i> | 5' TAGGAGGGCAACAACATT             |
| Rat TGF- $\beta$ 3     | <i>upper</i> | 5' GAACATTTCTTTCTGCTA             |
|                        | <i>lower</i> | 5' TCATTATCTTCTCTACC              |
| Rat activin- $\beta$ A | <i>upper</i> | 5' GCACITGAAGAAGAGACC             |
|                        | <i>lower</i> | 5' TCCTCTATCTCCACATACC            |
| Rat activin- $\beta$ B | <i>upper</i> | 5' AACTCATCTCCAACAACCT            |
|                        | <i>lower</i> | 5' TTATCTTTCTTCTCACTTC            |
| Rat nephrin            | <i>upper</i> | 5' ATGACGCAGAGTATGAAT             |
|                        | <i>lower</i> | 5' ACTAGAATGGAGAGGATTAC           |
| Rat podocin            | <i>upper</i> | 5' GGTCGTCTCATCAITCATA            |
|                        | <i>lower</i> | 5' GAGCAGTCAGTGTTCATAA            |
| Rat synaptopodin       | <i>upper</i> | 5' CTC GCT GCC CTT CAC CTA CTA TG |
|                        | <i>lower</i> | 5' ATC TGG TAT GGC TGC TGC TTG G  |
| Rat CD2AP              | <i>upper</i> | 5' GTATGACTACGGTGCTGTA            |
|                        | <i>lower</i> | 5' GCCATCCTTCTTCTGTA              |
| Rat agrin              | <i>upper</i> | 5' CCTACCTGGAAGTAAAG              |
|                        | <i>lower</i> | 5' CCATTGTAGAGGAGTAAGC            |
| Rat perlecan           | <i>upper</i> | 5' ATT CGA GGT TCG GAC CAG        |
|                        | <i>lower</i> | 5' CTG TAG TCC AAG GCT AAT G      |
| Rat glypican-1         | <i>upper</i> | 5' GTATCCAGGAAGACAGTAG            |
|                        | <i>lower</i> | 5' CTCTAACCCAGTGACAAA             |
| Rat syndecan-4         | <i>upper</i> | 5' TGTGTCTGTCTGTCTGAG             |
|                        | <i>lower</i> | 5' ACTGGCTCTACATTCTATTCT          |
| Rat heparanase         | <i>upper</i> | 5' CACTGGCTGTAAGAAGAC             |
|                        | <i>lower</i> | 5' AGCAATCAGAGGAAGAAGA            |
| Rat hyaluronidase      | <i>upper</i> | 5' GCTGGTGTATCTTCTGG              |
|                        | <i>lower</i> | 5' TAGGTACTTCTTGAGGTCT            |

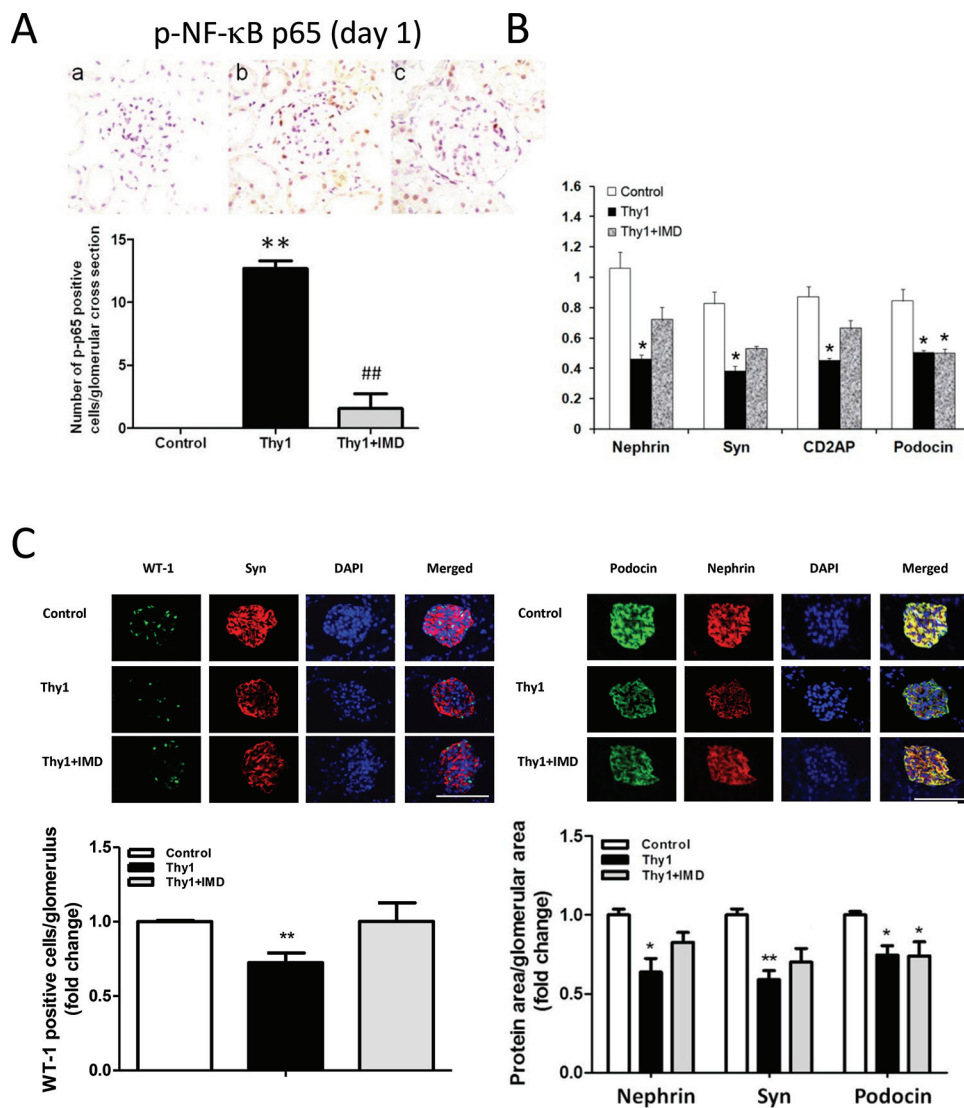

**Supplementary Figure S1.** (A) Representative immunohistochemical staining showing glomerular p-NF-κB p65 signals on d 1 (a, b, and c denote control rats, vehicle-treated nephritic rats, and IMD-0354-treated nephritic rats, respectively; original magnification, 400X). Bar graphs show semi-quantitative results of p-p65-positive cells per glomerular cross section. Values are the mean ± s.e.m. of 25-30 glomeruli. \*\* $p < 0.01$  vs. control rats; ## $p < 0.01$  vs. vehicle-treated nephritic rats. (B) IMD-0354 partially reversed downregulated mRNAs for nephrin, synaptopodin, and CD2AP on d 1. Each bar represents the mean ± s.e.m. of three experiments. \* $p < 0.05$  vs. control rats. (C) Upper panels show representative immunofluorescent staining of WT-1, synaptopodin, podocin, and nephrin within the glomeruli on d 1. Bar size, 100 μm. Lower graphs show semi-quantitatively IMD-0354 partially reversed the reduction of WT-1-positive cells per glomerulus and the area positively stained for podocyte-related proteins per glomerular area. Values are the mean ± s.e.m. of 25-30 glomeruli. \* $p < 0.05$ , \*\* $p < 0.01$  vs. control rats. Abbreviations: Syn, synaptopodin; Thy1, vehicle-treated nephritic rats; Thy1+IMD, IMD-0354-treated nephritic rats.

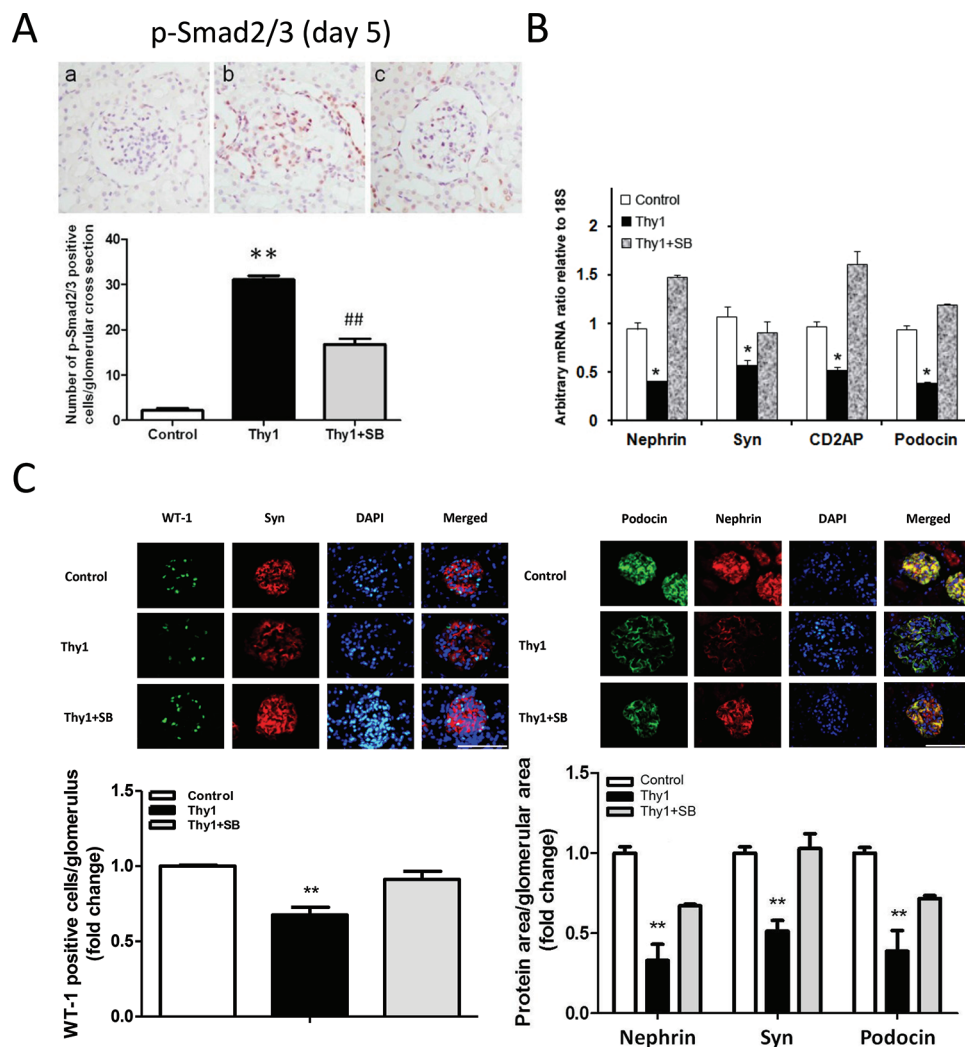

**Supplementary Figure S2.** (A) Representative immunohistochemical staining showing glomerular p-Smad2/3 signals on d 5 (a, b, and c denote control rats, vehicle-treated nephritic rats, and SB431542-treated nephritic rats, respectively; original magnification, 400X). Bar graphs show semi-quantitative results of p-Smad2/3-positive cells per glomerular cross section. Values are the mean  $\pm$  s.e.m. of 25-30 glomeruli. \*\* $p$ <0.01 vs. control rats; ## $p$ <0.01 vs. vehicle-treated nephritic rats. (B) SB431542 partially restored the downregulated podocyte-related gene expression on d 5. Each bar represents the mean  $\pm$  s.e.m. of three experiments. \* $p$ <0.05 vs. control rats. (C) Upper panels show representative immunofluorescent staining of WT-1, synaptopodin, podocin, and nephrin within the glomeruli on d 5. Bar size, 100  $\mu$ m. Lower graphs show semi-quantitatively SB431542 partially reversed the reduction of WT-1-positive cells per glomerulus and the area positively stained for podocyte-related proteins per glomerular area. Values are the mean  $\pm$  s.e.m. of 25-30 glomeruli. \*\* $p$ <0.01 vs. control rats. Abbreviations: Syn, synaptopodin; Thy1, vehicle-treated nephritic rats; Thy1+SB, SB431542-treated nephritic rats.
